# Supplementary material for: Evaluation of a digestion procedure based on the use of diluted nitric acid solutions and H2O2for the multielement determination of whole milk powder and bovine liver by ICP-based techniques
Source: Royal Society of Chemistry journal article supplement (doi:10.1039/c3ja50330e), 2013-11-22

## Supplementary information

1. Aspect of final digests of 500 mg of a) whole milk powder and b) bovine liver (5 min after digestion procedure). Digestion conditions: 1 mol L<sup>-1</sup> HNO<sub>3</sub> and 3 mL of 30% H<sub>2</sub>O<sub>2</sub> (whole milk powder); 1.5 mol L<sup>-1</sup> HNO<sub>3</sub> and 2.5 mL of 30% H<sub>2</sub>O<sub>2</sub> (bovine liver).

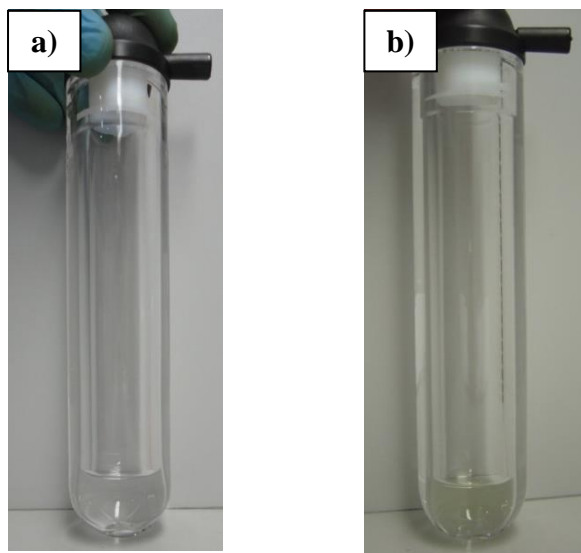

2. Aspect of final digests of 500 mg of whole milk powder using: a) 0.75 mol L<sup>-1</sup> HNO<sub>3</sub> combined with 4 mL of 30% H<sub>2</sub>O<sub>2</sub>; b) 1.0 mol L<sup>-1</sup> HNO<sub>3</sub> combined with 3 mL of 30% H<sub>2</sub>O<sub>2</sub>.

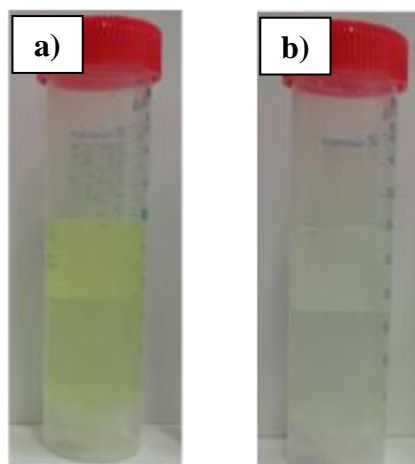

3. Aspect of final digests of 500 mg of whole milk powder using: a)  $1.0 \text{ mol L}^{-1}$   $\text{HNO}_3$  combined with 4 mL of 30%  $\text{H}_2\text{O}_2$ ; b)  $1.5 \text{ mol L}^{-1}$   $\text{HNO}_3$  combined with 2.5 mL of 30%  $\text{H}_2\text{O}_2$ .

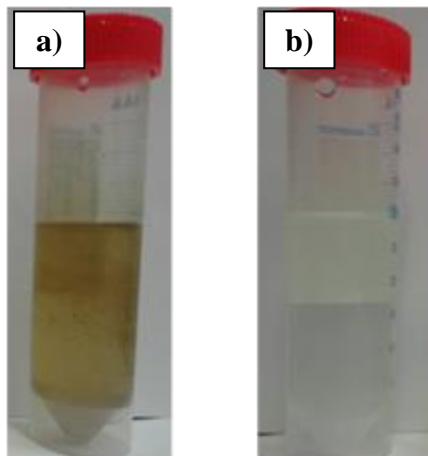

Supplement: c3ja50330e.pdf [file c3ja50330e.pdf]
